# Supplementary material for: Inequities in Treatments and Outcomes Among Patients Hospitalized With Hypertrophic Cardiomyopathy in the United States
Source: PubMed Central journal article supplement — J Am Heart Assoc. 2023 May 26;12(11):e029930. doi: 10.1161/JAHA.122.029930 (PMC10382014; doi:10.1161/jaha.122.029930), 2023-05-26

# **SUPPLEMENTAL MATERIAL**

**Table S1. Patient Characteristics by Race and Ethnicity, and Obstructive versus Nonobstructive Phenotype**

|                                  | Obstructive HCM |              |              | p      | Nonobstructive HCM |              |              | p      |
|----------------------------------|-----------------|--------------|--------------|--------|--------------------|--------------|--------------|--------|
|                                  | White           | Black        | Hispanic     |        | White              | Black        | Hispanic     |        |
| <b>Total (N)</b>                 | 18494 (77.0%)   | 4106 (17.1%) | 1410 (5.80%) |        | 20331 (69.8%)      | 6763 (23.2%) | 2013 (6.90%) |        |
| <b>Female</b>                    | 11216 (60.6%)   | 2737 (66.7%) | 854 (60.6%)  | <0.001 | 11203 (55.1%)      | 3561 (52.7%) | 1063 (52.8%) | <0.001 |
| <b>Age</b>                       |                 |              |              | <0.001 |                    |              |              | <0.001 |
| <b>18-34</b>                     | 530 (2.90%)     | 260 (6.30%)  | 102 (7.20%)  |        | 672 (3.30%)        | 460 (6.80%)  | 154 (7.70%)  |        |
| <b>35-54</b>                     | 2974 (16.1%)    | 1073 (26.1%) | 394 (27.9%)  |        | 3432 (16.9%)       | 2058 (30.4%) | 687 (34.1%)  |        |
| <b>55-64</b>                     | 3488 (18.9%)    | 977 (23.8%)  | 278 (19.7%)  |        | 3513 (17.3%)       | 1543 (22.8%) | 337 (16.7%)  |        |
| <b>65-74</b>                     | 4647 (25.1%)    | 896 (21.8%)  | 279 (19.8%)  |        | 4776 (23.5%)       | 1330 (19.7%) | 356 (17.7%)  |        |
| <b>75+</b>                       | 6855 (37.1%)    | 900 (21.9%)  | 357 (25.3%)  |        | 7938 (39.0%)       | 1372 (20.3%) | 479 (23.8%)  |        |
| <b>Insurance</b>                 |                 |              |              | <0.001 |                    |              |              | <0.001 |
| <b>Medicare</b>                  | 12286 (66.4%)   | 2290 (55.8%) | 713 (50.6%)  |        | 13667 (67.2%)      | 3626 (53.6%) | 945 (46.9%)  |        |
| <b>Medicaid</b>                  | 1258 (6.8%)     | 820 (20.0%)  | 308 (21.8%)  |        | 1507 (7.40%)       | 1454 (21.5%) | 569 (28.3%)  |        |
| <b>Private insurance</b>         | 4622 (25.0%)    | 813 (19.8%)  | 318 (22.6%)  |        | 4777 (23.5%)       | 1348 (19.9%) | 396 (19.7%)  |        |
| <b>Uninsured</b>                 | 328 (1.80%)     | 183 (4.50%)  | 71 (5.00%)   |        | 380 (1.90%)        | 335 (5.00%)  | 103 (5.10%)  |        |
| <b>Median ZIP income</b>         |                 |              |              | <0.001 |                    |              |              | <0.001 |
| <b>Q1: \$0-\$47,999</b>          | 3927 (21.2%)    | 2093 (51.0%) | 474 (33.6%)  |        | 5625 (27.7%)       | 792 (11.7%)  | 357 (17.7%)  |        |
| <b>Q2: \$48,000-\$60,999</b>     | 4744 (25.7%)    | 891 (21.7%)  | 351 (24.9%)  |        | 5423 (26.7%)       | 1169 (17.3%) | 425 (21.1%)  |        |
| <b>Q3: \$61,000-\$81,999</b>     | 4791 (25.9%)    | 662 (16.1%)  | 351 (24.9%)  |        | 5140 (25.3%)       | 1472 (21.8%) | 499 (24.8%)  |        |
| <b>Q4: \$82,000+</b>             | 5032 (27.2%)    | 460 (11.2%)  | 234 (16.6%)  |        | 4143 (20.4%)       | 3330 (49.2%) | 732 (36.4%)  |        |
| <b>Rurality</b>                  |                 |              |              | <0.001 |                    |              |              | <0.001 |
| <b>Urban</b>                     | 9407 (50.9%)    | 2927 (71.3%) | 1074 (76.2%) |        | 10213 (50.2%)      | 4579 (67.7%) | 1355 (67.3%) |        |
| <b>Town</b>                      | 5815 (31.4%)    | 920 (22.4%)  | 268 (19.0%)  |        | 6534 (32.1%)       | 1710 (25.3%) | 530 (26.3%)  |        |
| <b>Rural</b>                     | 3272 (17.7%)    | 259 (6.30%)  | 68 (4.80%)   |        | 3584 (17.6%)       | 474 (7.00%)  | 128 (6.40%)  |        |
| <b>Comorbidities</b>             |                 |              |              |        |                    |              |              |        |
| <b>Hypertension, complicated</b> | 5340 (28.9%)    | 1832 (44.6%) | 433 (30.7%)  | <0.001 | 6556 (32.2%)       | 3489 (51.6%) | 669 (33.2%)  | <0.001 |
| <b>Cardiac arrhythmia</b>        | 11507 (62.2%)   | 2097 (51.1%) | 807 (57.2%)  | <0.001 | 12496 (61.5%)      | 3098 (45.8%) | 988 (49.1%)  | <0.001 |
| <b>Congestive heart failure</b>  | 7805 (42.2%)    | 1913 (46.6%) | 567 (40.2%)  | <0.001 | 9099 (44.8%)       | 3406 (50.4%) | 837 (41.6%)  | <0.001 |
| <b>Obesity</b>                   | 3479 (18.8%)    | 1008 (24.5%) | 302 (21.4%)  |        | 3514 (17.3%)       | 1528 (22.6%) | 394 (19.6%)  | <0.001 |

|                        |              |             |             |        |              |              |             |        |
|------------------------|--------------|-------------|-------------|--------|--------------|--------------|-------------|--------|
| <b>Diabetes</b>        | 1728 (9.30%) | 683 (16.6%) | 176 (12.5%) |        | 2166 (10.7%) | 1267 (18.7%) | 328 (16.3%) | <0.001 |
| <b>Presence of ICD</b> | 2321 (12.6%) | 630 (15.3%) | 209 (14.8%) | <0.001 | 2657 (13.1%) | 755 (11.2%)  | 202 (10.0%) | <0.001 |

HCM, hypertrophic cardiomyopathy; ICD, implantable cardioverter-defibrillator. Comparisons were conducted using chi-square tests of independence.

**Table S2. Hospital-Year Characteristics**

|                                              | <b>Hospital-Years</b> |
|----------------------------------------------|-----------------------|
| <b>Total (N)</b>                             | 13020                 |
| <b>Size</b>                                  |                       |
| <b>Small</b>                                 | 3429 (26.3%)          |
| <b>Medium</b>                                | 4081 (31.3%)          |
| <b>Large</b>                                 | 5510 (42.3%)          |
| <b>Ownership</b>                             |                       |
| <b>Government, nonfederal (public)</b>       | 1290 (9.9%)           |
| <b>Private, not-for-profit (voluntary)</b>   | 9726 (74.7%)          |
| <b>Private, investor owned (proprietary)</b> | 2004 (15.4%)          |
| <b>Teaching status</b>                       |                       |
| <b>Rural</b>                                 | 1734 (13.3%)          |
| <b>Urban - Non-teaching hospital</b>         | 4498 (34.5%)          |
| <b>Urban - Teaching hospital</b>             | 6788 (52.1%)          |
| <b>Region</b>                                |                       |
| <b>Northeast</b>                             | 2562 (19.7%)          |
| <b>Midwest</b>                               | 3137 (24.1%)          |
| <b>South</b>                                 | 4715 (36.2%)          |
| <b>West</b>                                  | 2606 (20.0%)          |

Because hospitals cannot be tracked year to year, data are presented as hospital-years. To estimate annual n, divide by 7.

**Table S3. In-hospital Mortality Rate by Hypertrophic Cardiomyopathy Procedure**

|                                        | <b>Mortality Rate</b> |
|----------------------------------------|-----------------------|
| <b>Overall (n=53117)</b>               | 3.23%                 |
| <b>Septal myectomy (n=1654)</b>        | 3.33%                 |
| <b>Alcohol septal ablation (n=772)</b> | 1.55%                 |
| <b>ICD procedure (n=1598)</b>          | 0.56%                 |
| <b>Any HCM procedure (n=3871)</b>      | 1.91%                 |

Figure S1. Participant Flow Diagram

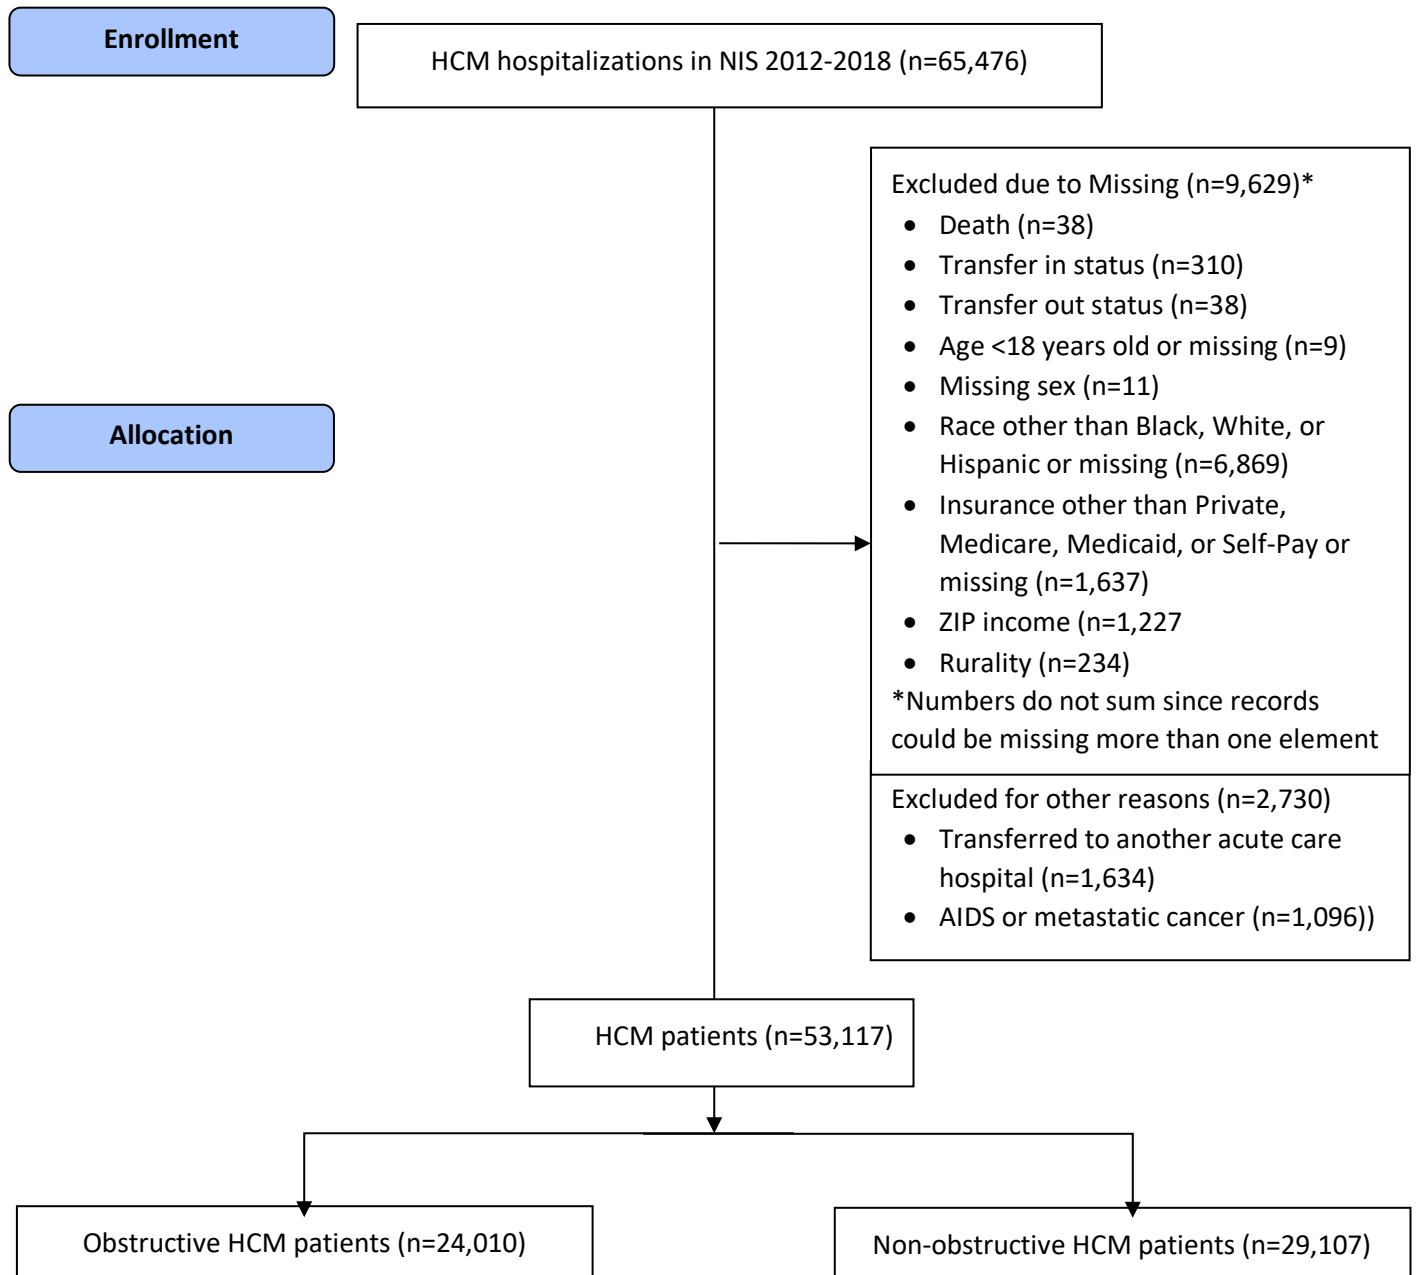

Supplement: JAH3-12-e029930-s001.pdf [file JAH3-12-e029930-s001.pdf]
